# Supplementary material
Source: Springer Nature journal article supplement (https://www.springermedizin.de/resource/supplementary/12891_2011_1247_MOESM2_ESM.pdf/9507456)

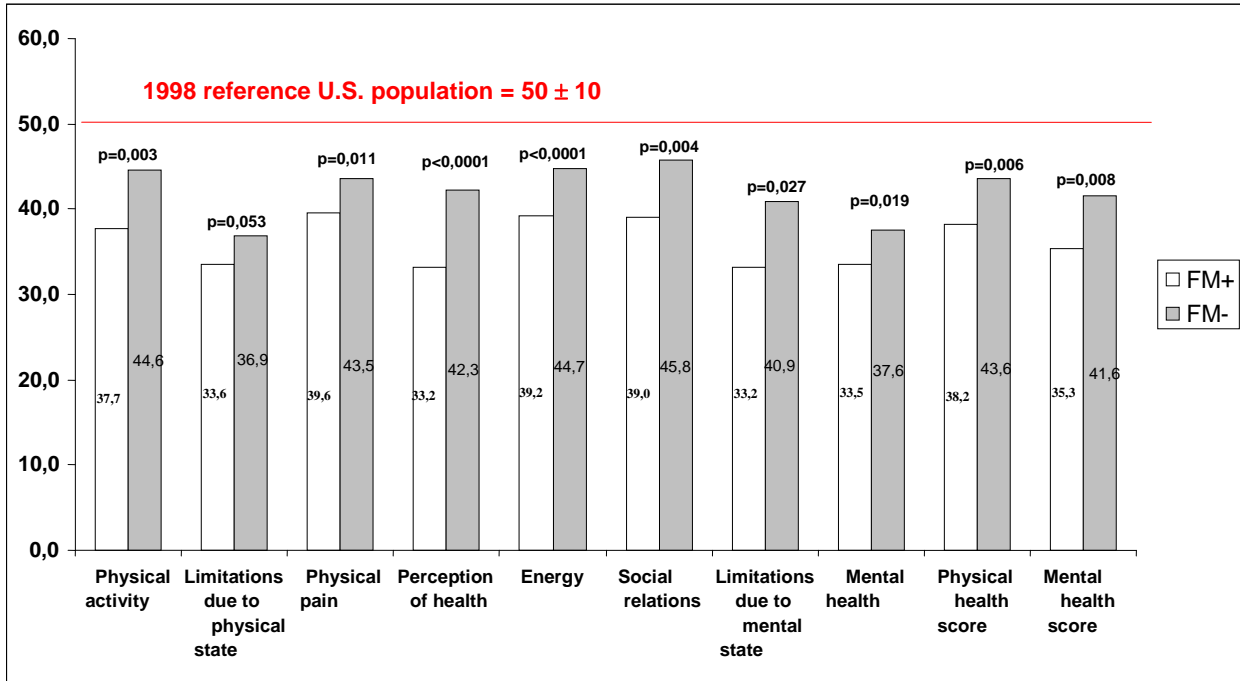

FM+: = confirmed diagnosis of fibromyalgia; FM-: = non-confirmed diagnosis of fibromyalgia

Supplement: MOESM2 [file 9507456]
